# Supplementary material for: IL1R2 Blockade Suppresses Breast Tumorigenesis and Progression by Impairing USP15‐Dependent BMI1 Stability
Source: PubMed Central journal article supplement (PMC6947699; doi:10.1002/advs.201901728), 2019-11-13
Supplement: ADVS-7-1901728-s001.pdf [file ADVS-7-1901728-s001.pdf]

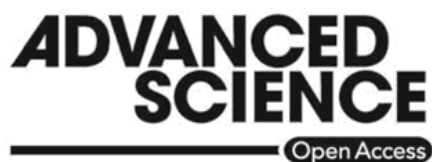

## Supporting Information

for *Adv. Sci.*, DOI: 10.1002/advs.201901728

**IL1R2 Blockade Suppresses Breast Tumorigenesis and Progression by Impairing USP15-Dependent BMI1 Stability**

*Lixing Zhang, Jiankun Qiang, Xiaoli Yang, Dong Wang, Adeel ur Rehman, Xueyan He, Weilong Chen, Dandan Sheng, Lei Zhou, Yi-zhou Jiang, Tao Li, Ying Du, Jing Feng, Xin Hu, Jian Zhang, Xi-chun Hu, Zhi-ming Shao, and Suling Liu\**

## **IL1R2 blockade suppresses breast tumorigenesis and progression by impairing USP15-dependent BMI1 stability**

Lixing Zhang<sup>1,2,#</sup>, Jiankun Qiang<sup>1,2,#</sup>, Xiaoli Yang<sup>1,2,#</sup>, Dong Wang<sup>1,3</sup>, Adeel ur Rehman<sup>3</sup>, Xueyan He<sup>1</sup>, Weilong Chen<sup>3</sup>, Dandan Sheng<sup>1,3</sup>, Lei Zhou<sup>1,3</sup>, Yi-Zhou Jiang<sup>1</sup>, Tao Li<sup>4</sup>, Ying Du<sup>5</sup>, Jing Feng<sup>5</sup>, Xin Hu<sup>1,2</sup>, Jian Zhang<sup>6</sup>, Xi-Chun Hu<sup>6</sup>, Zhi-Ming Shao<sup>1,2</sup>, Suling Liu<sup>1,2\*</sup>

<sup>1</sup> Fudan University Shanghai Cancer Center & Institutes of Biomedical Sciences; Shanghai Medical College; Key Laboratory of Breast Cancer in Shanghai; Innovation Center for Cell Signaling Network; Cancer Institute, Fudan University, Shanghai 200032, China;

<sup>2</sup> Department of Oncology, Department of Breast Surgery, Shanghai Medical College, Fudan University, Shanghai 200032, China;

<sup>3</sup> School of Life Science, The CAS Key Laboratory of Innate Immunity and Chronic Disease, University of Science & Technology of China, Hefei, Anhui 230027, China;

<sup>4</sup> State Key Laboratory of Proteomics, Institute of Basic Medical Sciences, National Center of Biomedical Analysis, Beijing 100850, China;

<sup>5</sup> Department of Laboratory Medicine & Central Laboratory, Southern Medical University Affiliated Fengxian Hospital, Shanghai, China, 201499;

<sup>6</sup> Department of Medical Oncology, Shanghai Medical College, Fudan

University, Shanghai 200032, China;

# These authors contributed equally to this work.

\* Correspondence to:

Suling Liu, Key Laboratory of Breast Cancer in Shanghai, Cancer Institute,

Department of Breast Surgery, Fudan University Shanghai Cancer Center,

Shanghai 200032, China; Tel/Fax: 086-21-34771023. Email:

[suling@fudan.edu.cn](mailto:suling@fudan.edu.cn)

**Supplementary Figures and Figure Legends:**

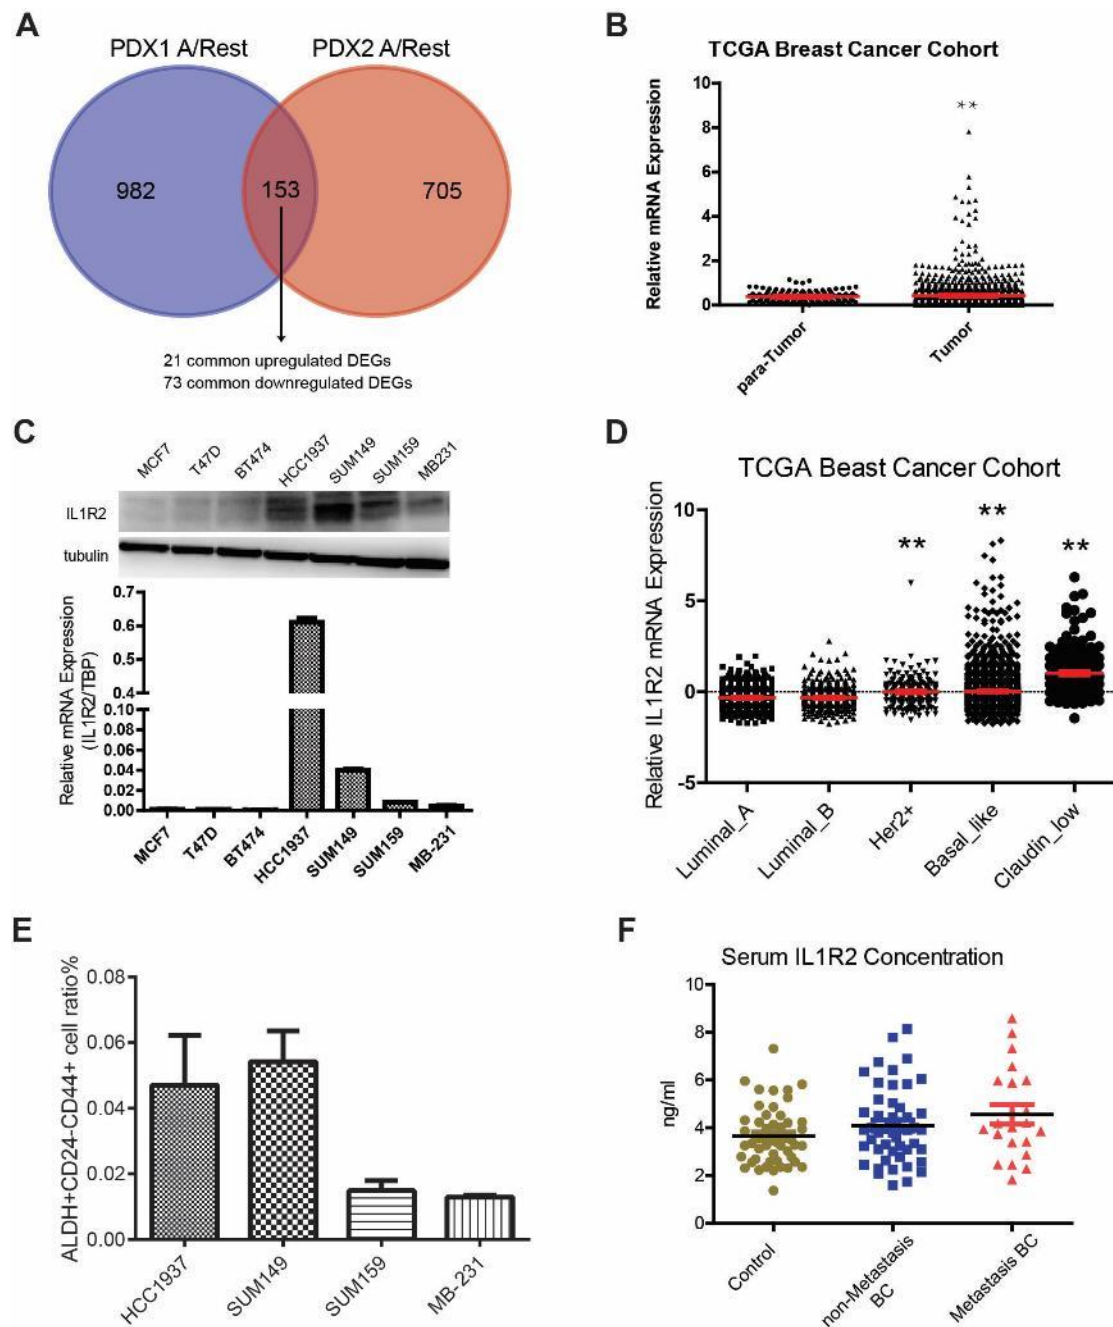

**Supplementary Figure 1. IL1R2 was upregulated in breast cancer cells. A.** 153 genes were deregulated in the BTIC population (A) isolated from 2 BC PDX xenograft tumors compared with non-ALDH<sup>+</sup>CD24<sup>-</sup>CD44<sup>+</sup> cancer cells (Rest). B. Analysis results of IL1R2 mRNA expression in tumor tissue compared to para-tumor tissue samples in TCGA database (\*, p<0.05 vs.

para-tumor). C. IL1R2 mRNA and protein expression in different breast cancer cell lines. D. IL1R2 mRNA expression was upregulated in Her2+ and basal-like especially claudin-low breast cancer samples (\*\*,  $p < 0.01$  vs. Luminal-A group). E. FACS analysis results showed that BTIC population in the HCC1937 and SUM149 cell lines were higher than that in SUM159 and MDA-MB-231 cells. E. HCC1937 and SUM149 cells had a higher percentage of BTIC than SUM159 and MDA-MB-231 cells. F. Serum soluble IL1R2 protein expression was analyzed in BC patients with metastasis (n=20) or without metastasis (n=50). Serum samples from healthy women (n=50) were used as controls.

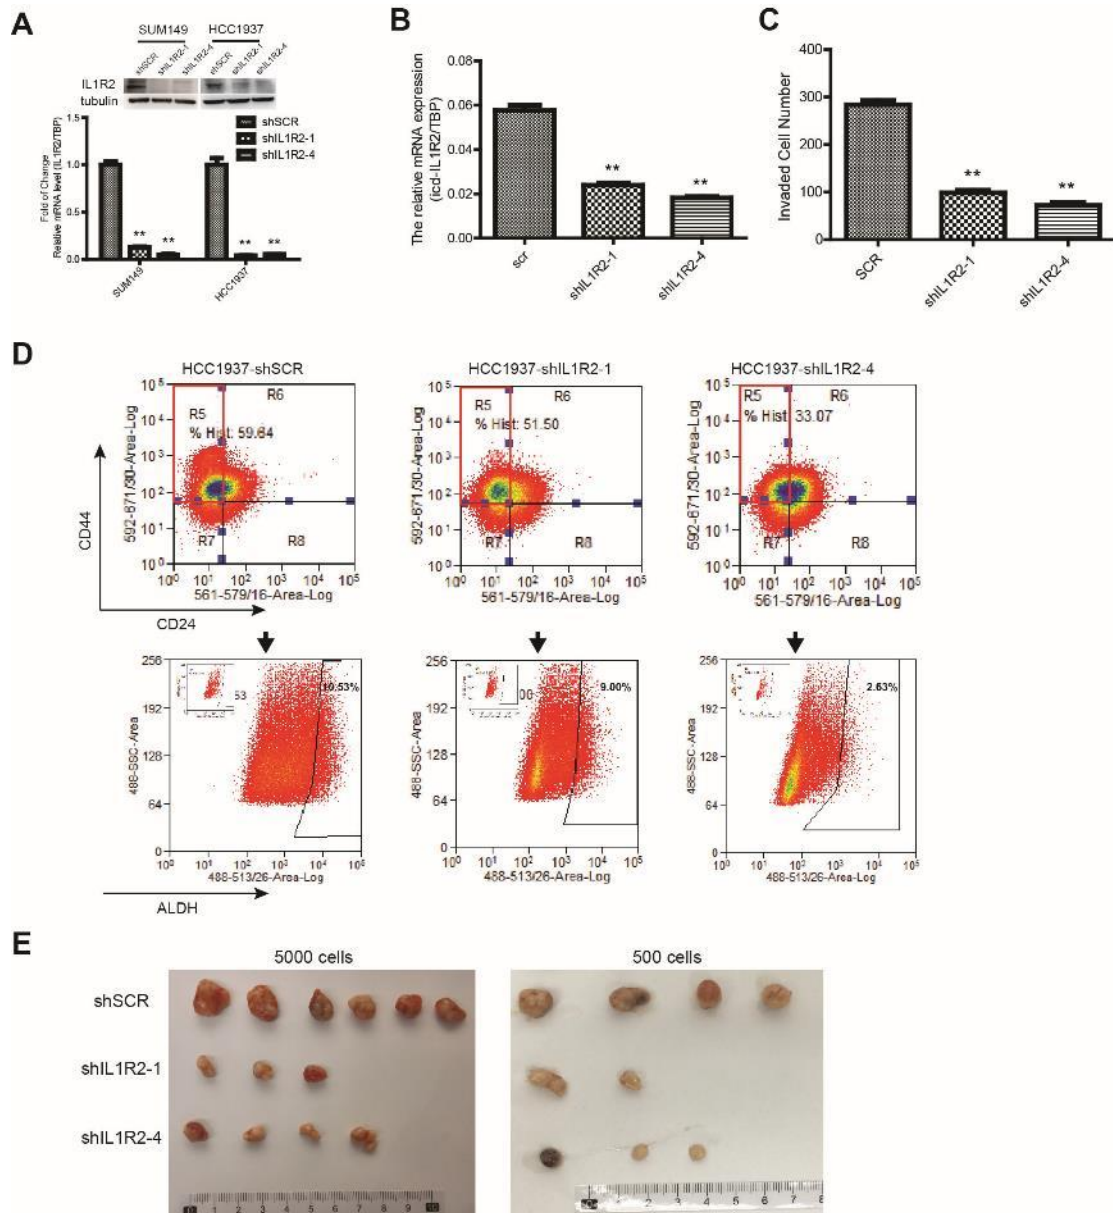

**Supplementary Figure 2. IL1R2 knockdown inhibited tumorigenic ability of breast cancer cells.** A. IL1R2 knockdown efficiency in the SUM149 and HCC1937 cells by qRT-PCR and Western blotting assay (\*\*,  $p < 0.01$  vs. shSCR group). B. icd-IL1R2 expression was also inhibited in the SUM149-shIL1R2 cells (\*\*,  $p < 0.01$  vs. shSCR group). C. IL1R2 knockdown inhibited SUM149 cells invasion ability by transwell assay. D. Representative FACS analysis results of ALDH<sup>+</sup>CD24<sup>-</sup>CD44<sup>+</sup> BTIC population in the HCC1937-shIL1R2 cells.

E. The xenograft tumor size of SUM149-shIL1R2 cells, SUM149-shSCR cells were used as control.

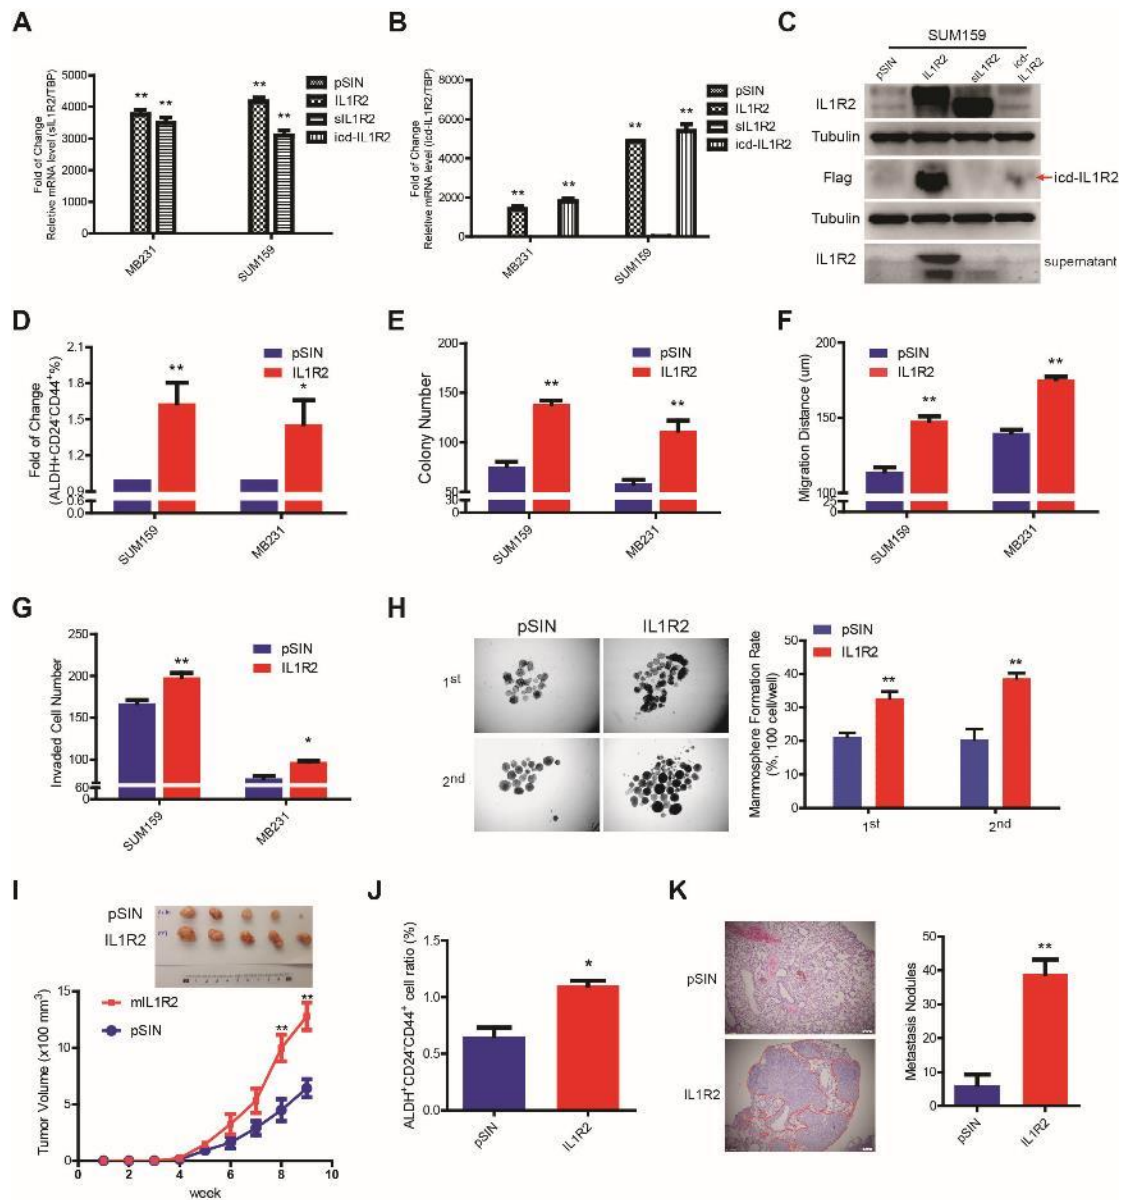

**Supplementary Figure 3. IL1R2 overexpression promoted the malignancy of BC cells.** A-C. Confirmation of IL1R2 and its soluble domain (sIL1R2), intracellular domain (icd-IL1R2) overexpression in BC cells and BC cell culture supernatant. D. Overexpression of IL1R2 induced BTIC population enrichment in SUM159 and MB231 cells (\*,  $p < 0.05$ ; \*\*,  $p < 0.01$  vs. the vector control). E.

Overexpression of IL1R2 promoted cell proliferation ability in the colony formation assay (\*\*,  $p < 0.01$  vs. the vector control). F and G. Overexpression of IL1R2 promoted cell migration and invasion ability in the wound-healing assay or in the transwell assay (\*\*,  $p < 0.01$  vs. the vector control). H. IL1R2 overexpression promoted cell self-renewal ability in the mammosphere formation assay (\*\*,  $p < 0.01$  vs. the vector control) (Representative images were shown. Original magnification, 40X). I. IL1R2 overexpression promoted the tumor formation ability of MB231-IL1R2 cells in nude mice (\*\*,  $p < 0.01$  vs. the vector control). J. Flow cytometry analysis results for the BTIC population in xenograft tumors (\*,  $p < 0.01$  vs. the vector control). K. IL1R2 overexpression in MB231 cells promoted metastasis nodule formation in mouse lungs (\*,  $p < 0.05$ ; \*\*,  $p < 0.01$  vs. the vector control) (Representative images were shown. Original magnification, 40X).



**A**

Functional enrichment analysis of 246 upregulated genes in PDX2 BTICs

| Term                                                                                        | Count | PValue      | Fold Enrichment | FDR         |
|---------------------------------------------------------------------------------------------|-------|-------------|-----------------|-------------|
| GO:0006954-inflammatory response                                                            | 18    | 3.16E-05    | 3.322955145     | 0.051877084 |
| GO:0006955-immune response                                                                  | 18    | 1.16E-04    | 2.991448931     | 0.189863379 |
| GO:0032496-response to lipopolysaccharide                                                   | 11    | 1.23E-04    | 4.692886179     | 0.201018806 |
| GO:0006629-lipid metabolic process                                                          | 9     | 0.001858651 | 4.010828025     | 3.009071334 |
| GO:0043691-reverse cholesterol transport                                                    | 4     | 0.001983654 | 15.54814815     | 3.208362767 |
| GO:0051092-positive regulation of NF-kappaB transcription factor activity                   | 8     | 0.002956998 | 4.208521303     | 4.747053655 |
| GO:0042346-positive regulation of NF-kappaB import into nucleus                             | 4     | 0.003133062 | 13.32698413     | 5.022916516 |
| GO:0006919-activation of cysteine-type endopeptidase activity involved in apoptotic process | 6     | 0.006611214 | 5.057831325     | 10.32116384 |
| GO:0010951-negative regulation of endopeptidase activity                                    | 7     | 0.007714262 | 4.047658402     | 11.94259516 |
| GO:0046470-phosphatidylcholine metabolic process                                            | 3     | 0.008419596 | 20.99           | 12.96493004 |
| GO:0007267-cell-cell signaling                                                              | 10    | 0.010683334 | 2.754593176     | 16.17128667 |
| GO:0001666-response to hypoxia                                                              | 8     | 0.011719897 | 3.254263566     | 17.60214274 |
| GO:0086004-regulation of cardiac muscle cell contraction                                    | 3     | 0.012119677 | 17.49166667     | 18.14783766 |
| GO:0010628-positive regulation of gene expression                                           | 10    | 0.012942133 | 2.670483461     | 19.25982823 |

**B**

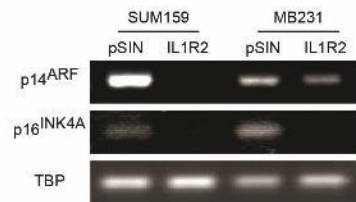

**C**

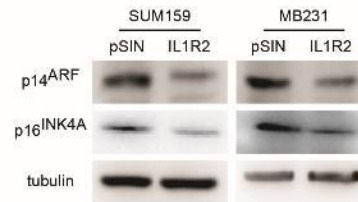

**D**

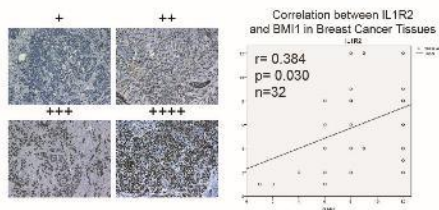

**E**

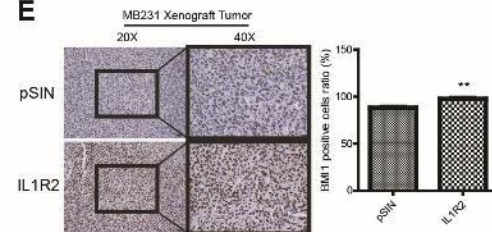

**F**

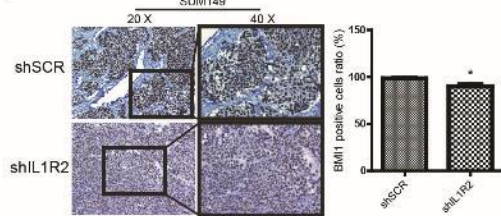

**G**

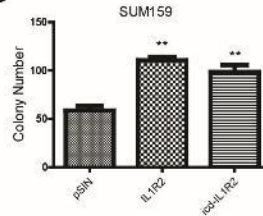

**H**

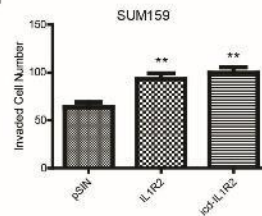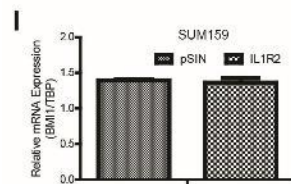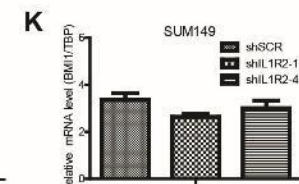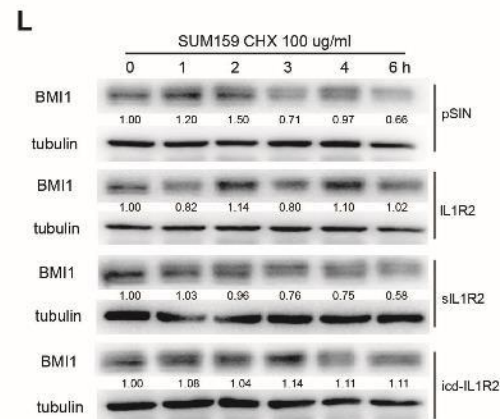

**J**

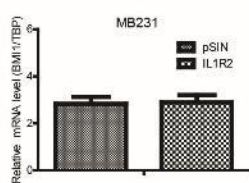

**Supplementary Figure 4. IL1R2 regulated BMI1 protein expression in**

**breast cancer cells.** A. GO analysis result of upregulated genes in BTICs

compared with non-BTICs of xenografts from PDXs. B&C. IL1R2

overexpression inhibited p16<sup>INK4a</sup> and p19<sup>ARF</sup> mRNA (B) and protein (C) expression. D. Representative IHC analysis results of BMI1 expression in BC samples (left) (Original magnification, 200X) and correlation between IL1R2 and BMI1 expression (right). E. Representative IHC results of BMI1 protein expression in the MB231-IL1R2 xenograft tumor tissue samples. F. Representative IHC results of BMI1 protein expression in the SUM149-shIL1R2 xenograft tumor tissue samples. G. Icd-IL1R2 overexpression induced SUM159 cells proliferation by colony formation assay. H. Icd-IL1R2 overexpression induced SUM159 cells invasion by transwell assay. I-K. BMI1 mRNA level was not significantly deregulated in the SUM159-IL1R2, MB231-IL1R2 or SUM149-shIL1R2 cells. L. Overexpression of IL1R2 or icd-IL1R2 inhibited BMI1 protein degradation in SUM159 cells.

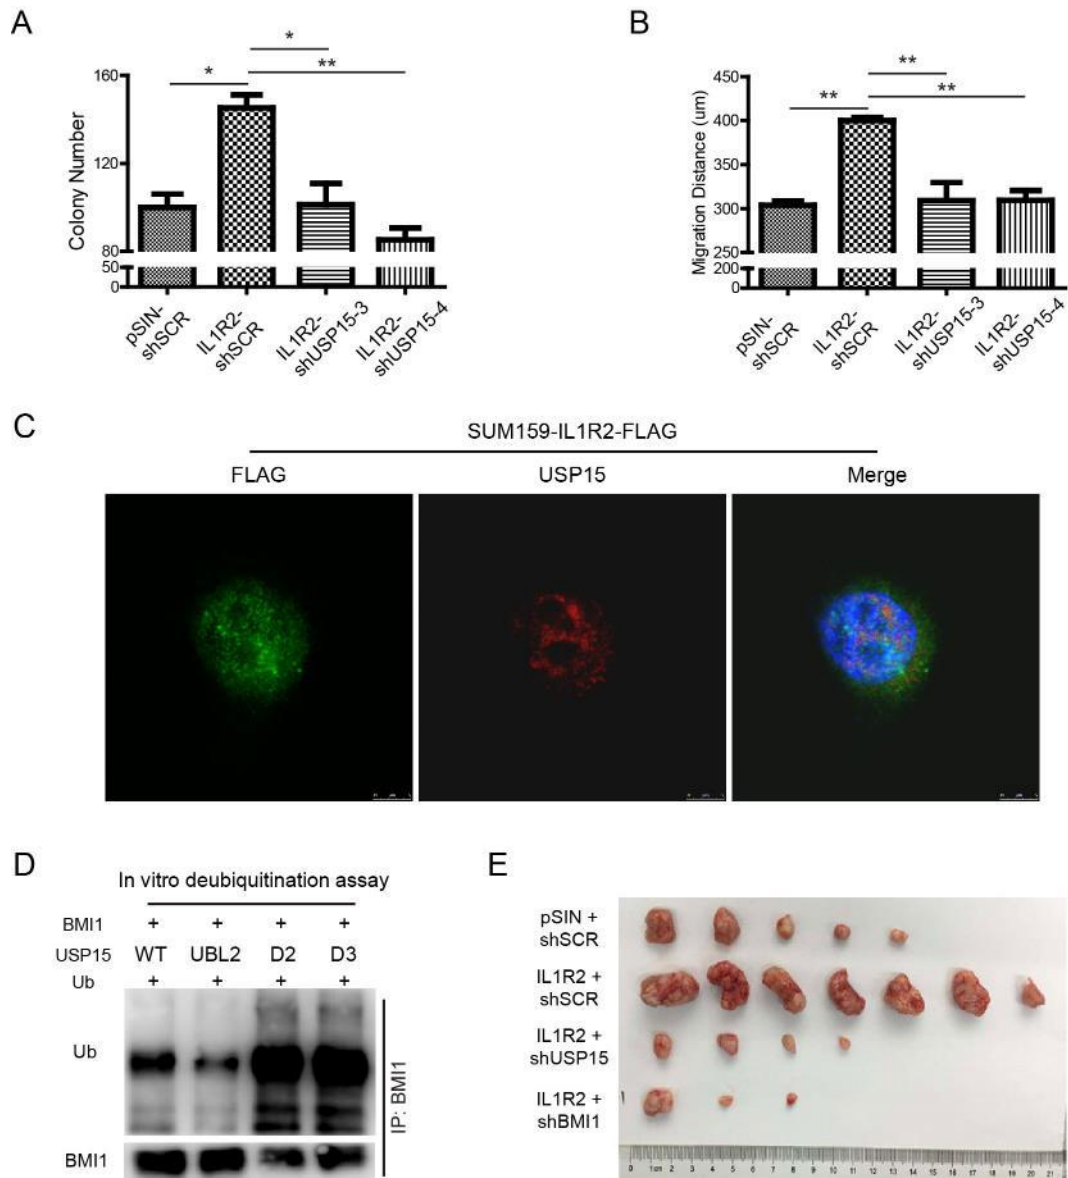

**Supplementary Figure 5. Inhibition of USP15 reversed the promotion effect of IL1R2 on BC cell growth in vitro and in vivo.** A & B. The cell proliferation and migration were inhibited in SUM159-IL1R2 cells with USP15 knockdown (\*,  $p < 0.05$ ; \*\*,  $p < 0.01$  vs. the group indicated,  $n = 3$  for each group). C. IL1R2 and USP15 were co-localized in the nucleus of SUM159 cells. D. In vitro deubiquitination assay results showed that deletion of UBL2 domain significantly enhanced the activity of USP15 on BMI1 deubiquitination. E. The xenograft tumor size of SUM159-IL1R2-shSCR, SUM159-IL1R2-shUSP15 or

SUM159-IL1R2-shBMI1 cells, SUM149-shSCR cells were used as control.

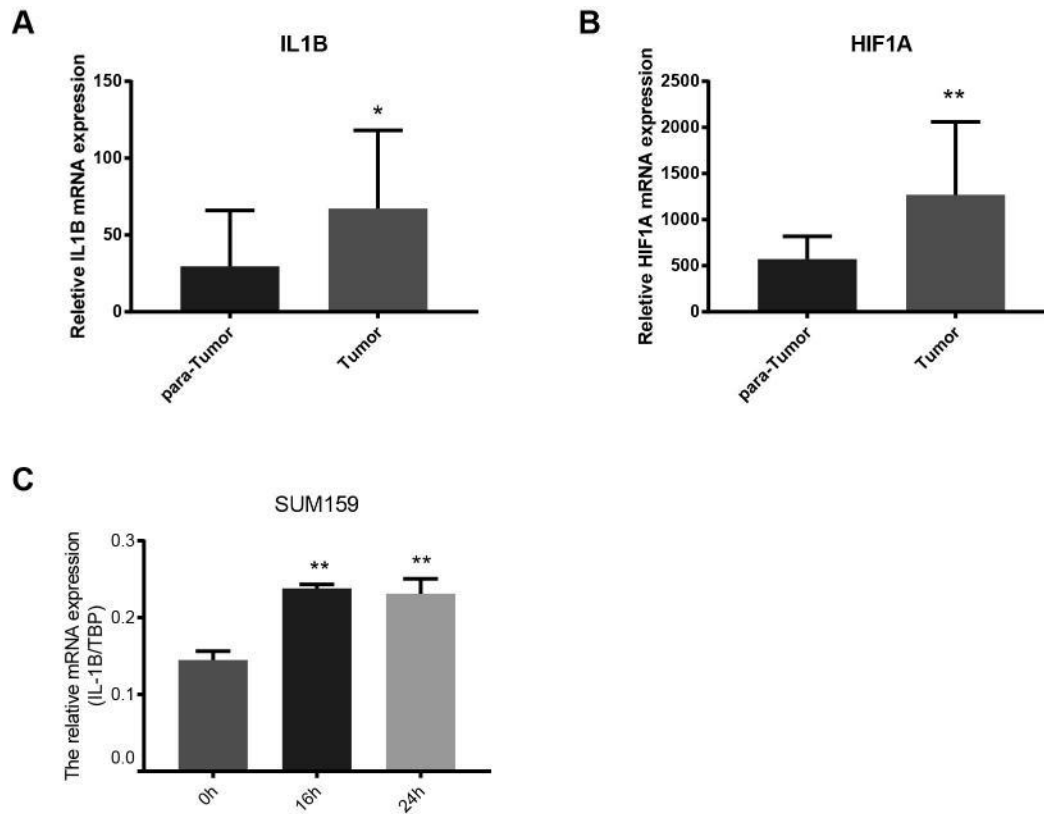

**Supplementary Figure 6. IL1 $\beta$  was upregulated in BC cells under hypoxia.**

A and B. IL1 $\beta$  and HIF1 $\alpha$  mRNA expression level in para-Tumor and BC tumor tissues from RNAseq results (\*, p<0.05; \*\*, p<0.01). C. qRT-PCR assay results showed that IL1 $\beta$  mRNA expression was upregulated in a time-dependent manner in SUM159 cells under hypoxia (1% O<sub>2</sub>) (\*\*, p<0.01).

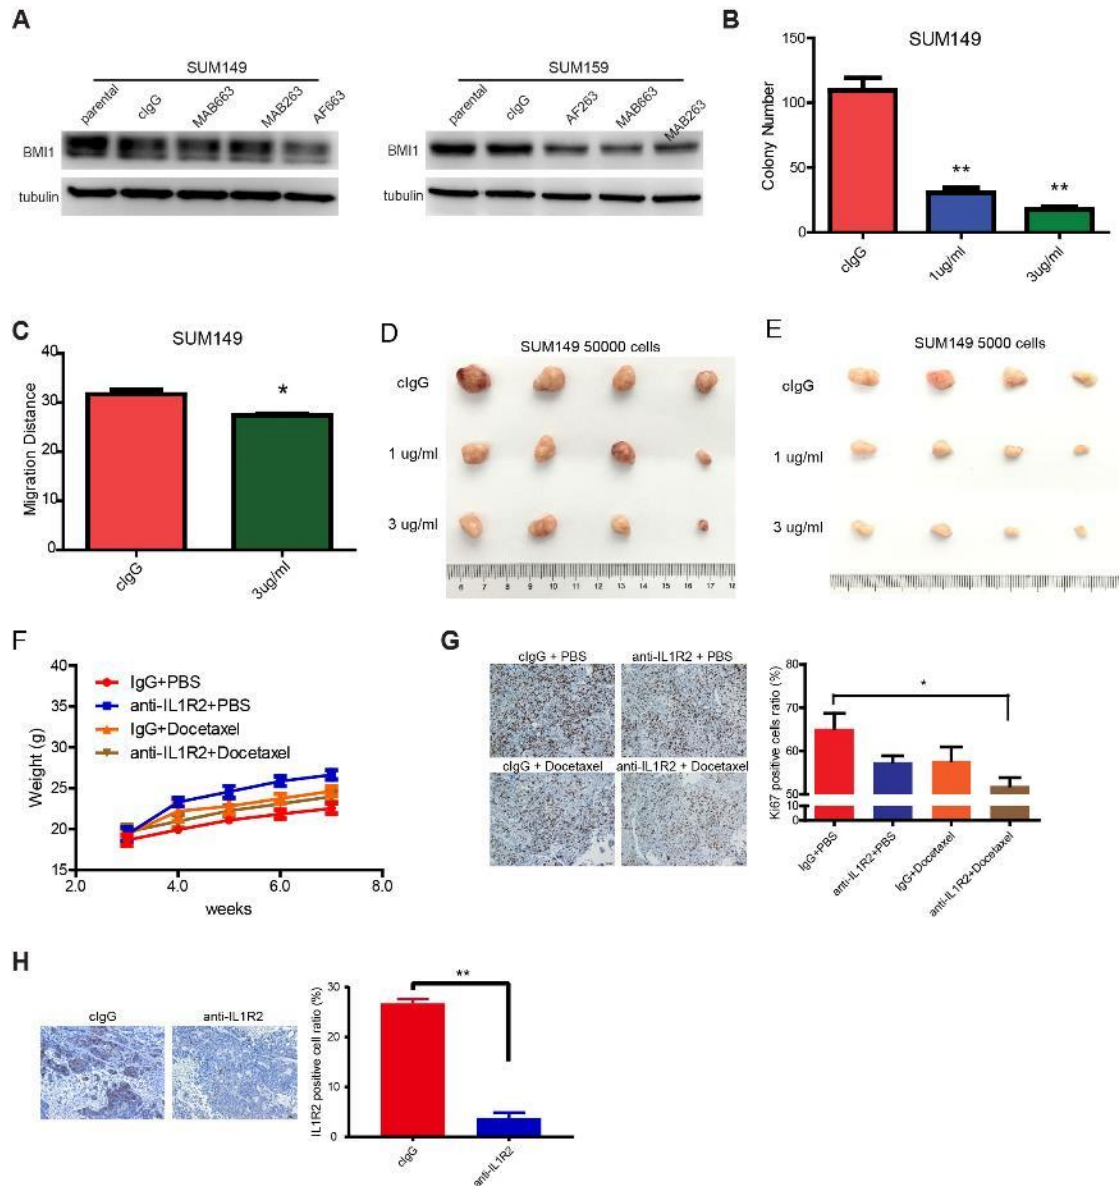

**Supplementary Figure 7. Neutralizing antibody to IL1R2 pretreatment**

**inhibited breast cancer cells tumorigenesis ability.**

A. BMI1 protein expression was downregulated after different IL1R2 neutralizing antibody

treatments in SUM149 and SUM159 cells. B and C. Neutralizing antibody

pretreatment (7 days) inhibited cell proliferation (n=3 for each group),

migration (n=3 for each group) (\*, p<0.05; \*\*, p<0.01 vs. clgG group). D & E.

Xenograft tumors of neutralizing antibody pretreated SUM149 cells (50000

and 5000 cells). Notice that some xenograft tumors which were too small to

be obtained (diameter: ~ 2mm) had not been shown. F. Mice body weight was not inhibited after treatment. G. IHC analysis results showed that Ki67-positive cells were decreased in the neutralizing antibody and docetaxel combination group. (\*,  $p < 0.05$ ) (Representative images were shown, 200X). H. IHC analysis results showed that IL1R2-positive cells were decreased in the neutralizing antibody treated PDX tumors.

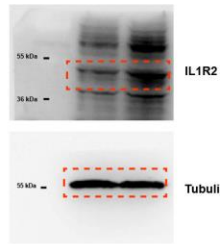

Fig 1D

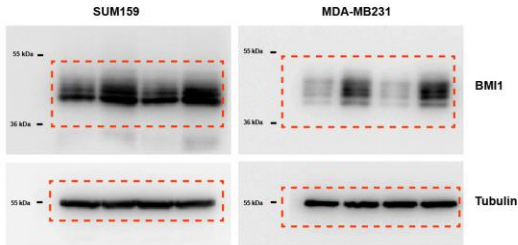

Fig 3B

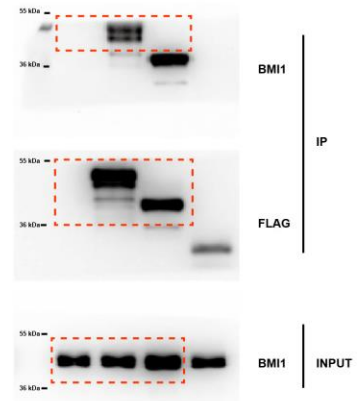

Fig 3F

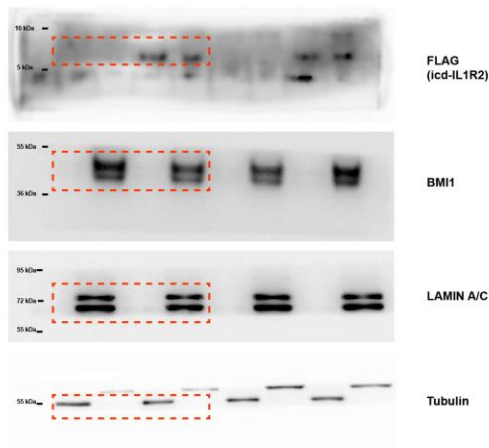

Fig 3G

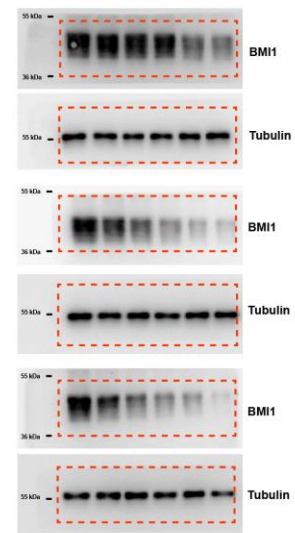

Fig 3I

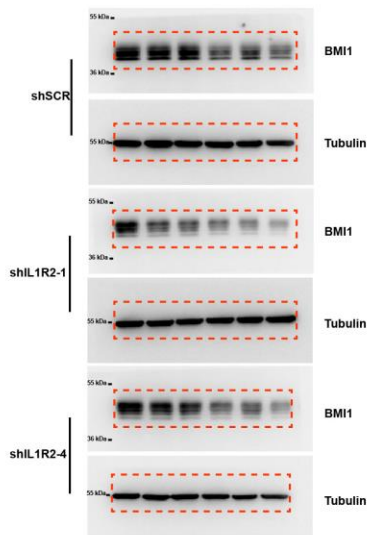

Fig 3J

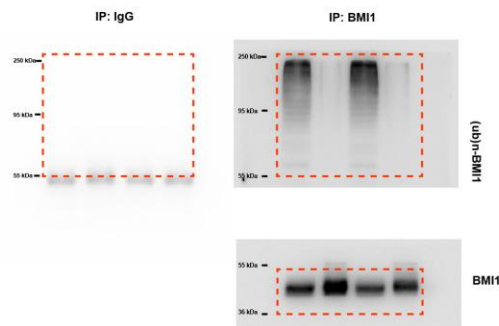

Fig 3K

Supplementary Figure 8. Uncropped blots of Figure 1 and 3.

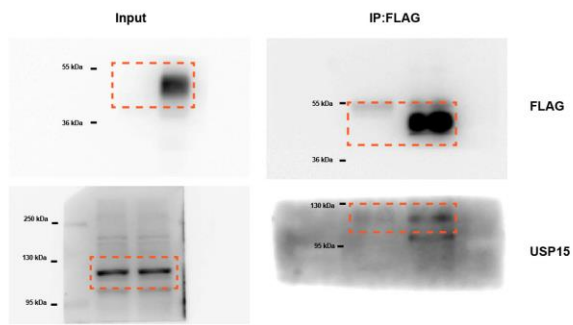

Fig 4A

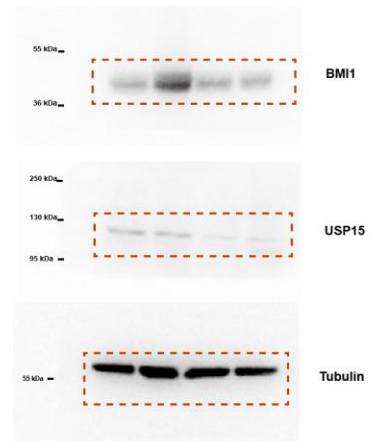

Fig 4B

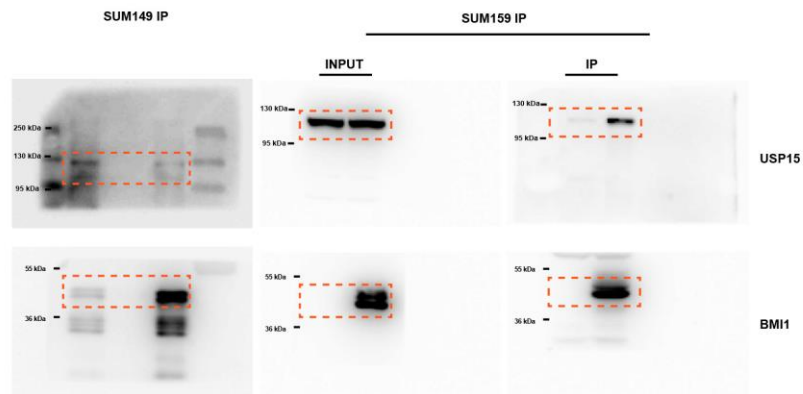

Fig 4C

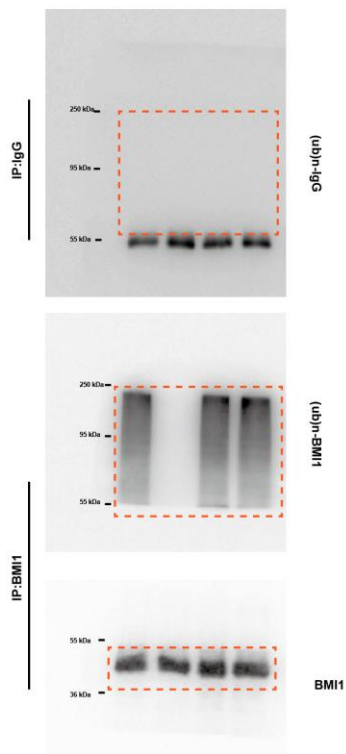

Fig 4E

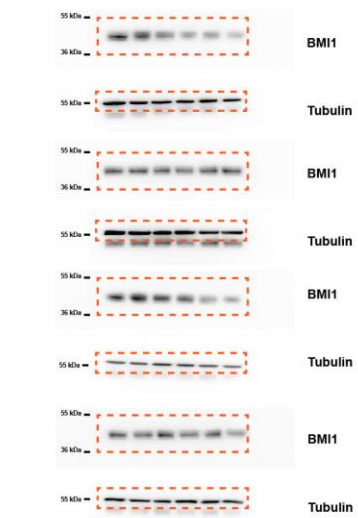

Fig 4D

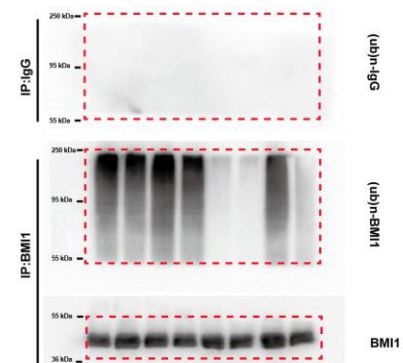

Fig 4F



**Supplementary Figure 9. Uncropped blots of Figure 4.**

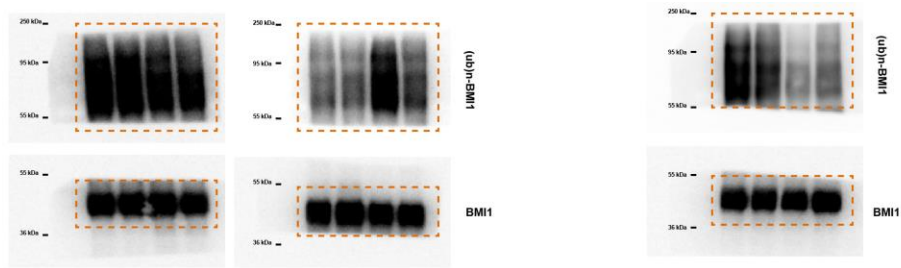

Fig 4G

Fig 4H

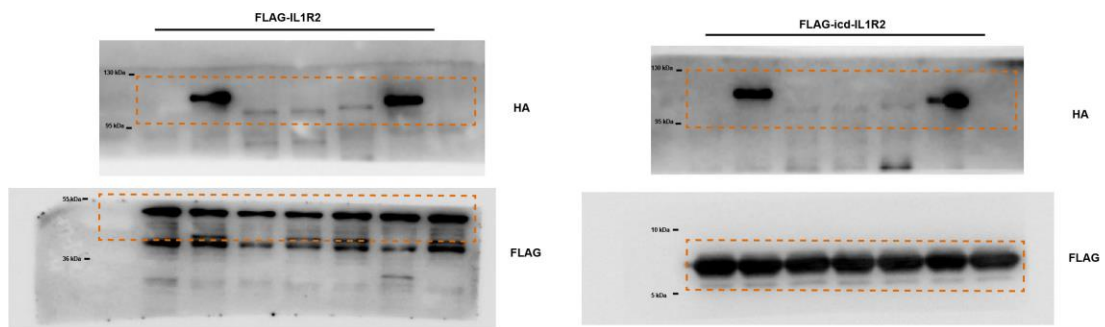

Fig 4I

Fig 4J

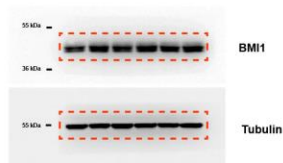

Fig 5A

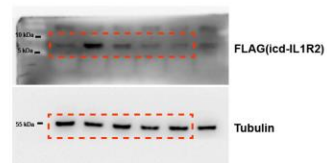

Fig 5B

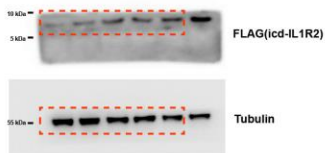

Fig 5C

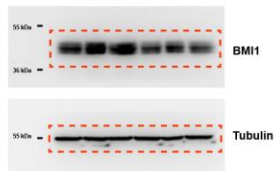

Fig 5D

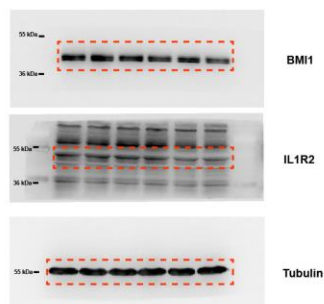

Fig 6A

**Supplementary Figure 10. Uncropped blots of Figure 4, 5 and 6.**

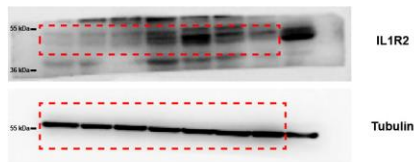

Supplementary Fig 1C

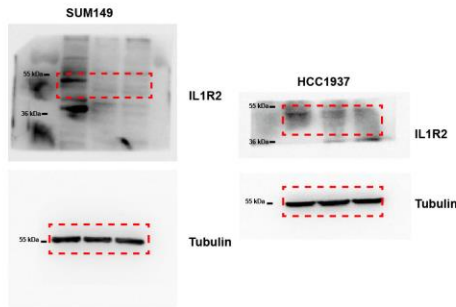

Supplementary Fig 2A

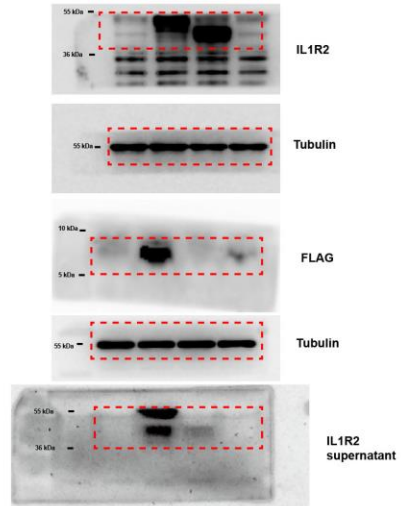

Supplementary Fig 3C

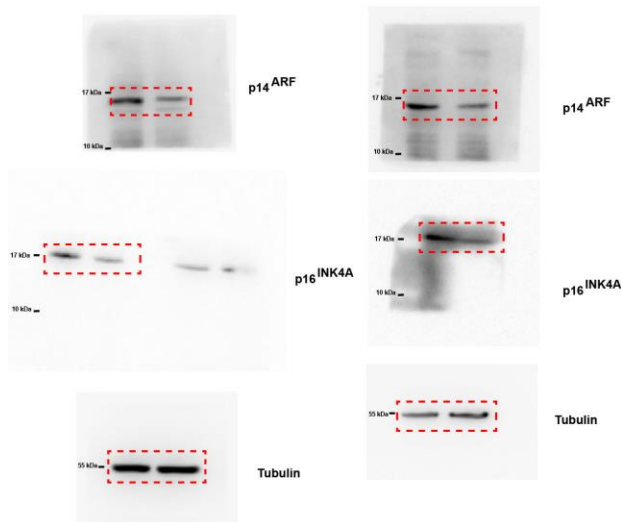

Supplementary Fig 4C

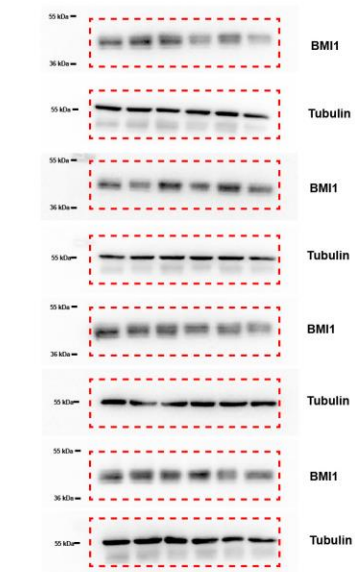

Supplementary Fig 4L

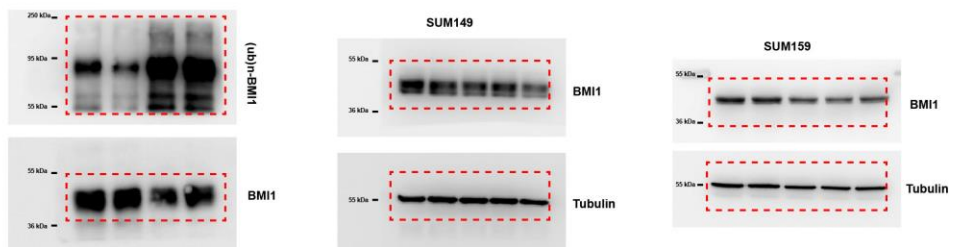

Supplementary Fig 5D

Supplementary Fig 7A

Supplementary Figure 11. Uncropped blots of supplementary Figure 1, 2, 3, 4, 5, 7.

## Supplementary Tables:

**Supplementary Table 1. Antibodies used in this study**

| <b>Antibody</b>             | <b>Clone, source</b>                        | <b>Dilution</b> | <b>Company</b> |
|-----------------------------|---------------------------------------------|-----------------|----------------|
| <b>For Western Blotting</b> |                                             |                 |                |
| IL1R2                       | Goat IgG (AF263)                            | 1:500           | R&D            |
| BMI1                        | Rabbit IgG (6964S)                          | 1:1000          | CST            |
| FLAG                        | Rabbit IgG (F7425)                          | 1:1000          | Sigma          |
| HA                          | Rabbit IgG (3724)                           | 1:1000          | CST            |
| USP15                       | Rabbit IgG (A300-923A)                      | 1:1000          | Bethyl         |
| Ubiquitin                   | Mouse IgG1 (SC8017)                         | 1:500           | Santa Cruz     |
| HIF1A                       | Mouse IgG1 (610958)                         | 1:500           | BD             |
| Beta-tubulin                | Mouse IgG1 (HC101)                          | 1:1000          | TransGen       |
| Lamin A/C                   | Rabbit IgG (ab133256)                       | 1:1000          | Abcam          |
| Second<br>antibody          | HRP conjugated goat anti-rabbit IgG (C129)  | 1:3000          | TransGen       |
| Second<br>antibody          | HRP conjugated goat anti-mouse IgG (A267)   | 1:3000          | TransGen       |
| Second<br>antibody          | HRP conjugated donkey anti-goat (SA00001-3) | 1:3000          | Proteintech    |
| <b>For IHC</b>              |                                             |                 |                |
| IL1R2                       | Goat polyclone antibody (AF263)             | 1:100           | R&D            |
| BMI1                        | Rabbit IgG (6964S)                          | 1:200           | CST            |

**For Immunoprecipitation**

|                 |                                     |  |       |
|-----------------|-------------------------------------|--|-------|
| HA              | Rabbit IgG (3724)                   |  | CST   |
| FLAG            | Anti-FLAG M2 Magnetic Beads (M8823) |  | Sigma |
| BMI1            | Rabbit IgG (6964S)                  |  | CST   |
| Isotype Control | Rabbit IgG                          |  | Sigma |

**For Immunofluorescence Staining**

|                 |                                                        |       |            |
|-----------------|--------------------------------------------------------|-------|------------|
| BMI1            | Rabbit IgG (6964S)                                     | 1:200 | CST        |
| IL1R2           | Goat polyclone antibody (AF263)                        | 1:200 | R&D        |
| Second antibody | Alexa Fluor 488 donkey anti-mouse IgG (Cat No. A21202) | 1:100 | Invitrogen |

**Neutralizing antibody**

|                 |                                 |  |       |
|-----------------|---------------------------------|--|-------|
| Isotype Control | Mouse IgG                       |  | Sigma |
| IL1R2           | Goat polyclone antibody (AF263) |  | R&D   |
| IL1R2           | Mouse IgG1 (MAB663)             |  | R&D   |
| IL1R2           | Mouse IgG2A (MAB263)            |  | R&D   |

---

**Supplementary Table 2. Primer sequences for plasmid construction.**

| <b>Identifier</b>     | <b>Forward (5'-3')</b>                                        |
|-----------------------|---------------------------------------------------------------|
| IL1R2-Flag-pSIN-F     | TTGCGGATCCATGTTGCGCTTGTACGTGTTG                               |
| IL1R2-Flag-pSIN-R     | TTGCGCTAGCTCATTGTCATCATCGTCCTTGTAGTCCTTGGGATAGGA<br>TTGAAAGTC |
| sIL1R2-Flag-pSIN-F    | TTGCGGATCCATGTTGCGCTTGTACGTGTTG                               |
| sIL1R2-Flag-pSIN-R    | TTGCGCTAGCTCATTGTCATCATCGTCCTTGTAGTCCTGGCGTGGCCC<br>CTCGGT    |
| lcd-IL1R2-Flag-pSIN-F | TTGCGGATCCATGAGACGGTGCAAACACAGAACTG                           |
| lcd-IL1R2-Flag-pSIN-R | TTGCGCTAGCTCATTGTCATCATCGTCCTTGTAGTCCTTGGGATAGGA<br>TTGAAAGTC |
| BMI1-HA-pLVX-F        | GTTCCAGATTACGCTCTCGAGATGCATCGAACACGAGAATC                     |
| BMI1-HA-pLVX-R        | CGCGGCCGCTCTAGACTACTCGAGTCAACCAGAAGAAGTTGCTG                  |
| USP15-HA-pLVX-F       | TTCCAGATTACGCTCTCGAGATGGCGGAAGGCGGAGCGGC                      |
| USP15-HA-pLVX-R       | GCCGCTCTAGACTACTCGAGTTAGTTAGTGTGCATACAG                       |
| shIL1R2-1-pLKO.1-F    | CTCGAGAAGTCAAAGGAAGTTCACGGGTTTTTGAATTCTCGACCTCGAG             |
| shIL1R2-1-pLKO.1-R    | ACTTCTCGAGAAGTCAAAGGAAGTTCACGGGCGGTGTTTCGTCCTTTCC             |
| shIL1R2-4-pLKO.1-F    | CTCGAGTAATAAATTCTATTACCCGGGTTTTTGAATTCTCGACCTCGAG             |
| shIL1R2-4-pLKO.1-R    | ATTACTCGAGTAATAAATTCTATTACCCGGGCGGTGTTTCGTCCTTTCC             |
| shBMI1-pLKO.1-F       | CTCGAGTTTGTCTTTGTTTACTTTCCGTTTTTGAATTCTCGACCTCGAG             |
| shBMI1-pLKO.1-R       | CAAACCTCGAGTTTGTCTTTGTTTACTTTCCGCGGTGTTTCGTCCTTTCC            |
| shUSP15-3-pLKO.1-F    | CTCGAGATTATAGCGGCAAGGACCTGCTTTTTTGAATTCTCGACCTCGAG            |

|                           |                                                  |
|---------------------------|--------------------------------------------------|
| shUSP15-3-pLKO.1-R        | TAATCTCGAGATTATAGCGGCAAGGACCTGCCGGTGTTCGTCCTTTCC |
| shUSP15-4-pLKO.1-F        | CTCGAGTATCGGCACATTCTCAAGAGCTTTTGAATTCTCGACCTCGAG |
| shUSP15-4-pLKO.1-R        | GATACTCGAGTATCGGCACATTCTCAAGAGCCGGTGTTCGTCCTTTCC |
| IL1R2-promoter-psiCHECK-F | GAGGAACTTGGTTAGGTACCGGAGACAGGGGCTCAATT           |
| IL1R2-promoter-psiCHECK-R | GCCATGGTGGCTAGCCTGGGGAAGGCTGCCAGGCCAGACT         |

F, forward primer; R, reverse primer

### Supplementary Table 3. The sequences of primers used for qRT-PCR

| Gene name | Forward (5'-3')           | Reverse (5'-3')           |
|-----------|---------------------------|---------------------------|
| POU5F1    | CTTGCTGCAGAAGTGGGTGGAGGAA | CTGCAGTGTGGGTTTCGGGCA     |
| Notch1    | CCTGAGGGCTTCAAAGTGTC      | CGGAACTTCTTGGTCTCCAG      |
| Notch4    | TGTGAACGTGATGTCAACGAG     | ACAGTCTGGGCCTATGAAACC     |
| SOX2      | AAATGGGAGGGGTGCAAAGAGGAG  | CAGCTGTCATTTGCTGTGGGTGATG |
| sIL1R2    | ATTGCAGGACACAAGCACAG      | GTTCCCTCAAGCAGGCAAAG      |
| lcd-IL1R2 | AGACGGTGCAAACACAGAAGTCTG  | TCACTTGGGATAGGATTGAAAG    |
| BMI1      | TCCACAAAGCACACACATCA      | CTTTCATTGTCTTTCCGCC       |
| USP15     | ATGGTGATGCCCAGTCACTT      | TGTTCAACCACCTTTCGTGC      |
| TBP       | TGCACAGGAGCCAAGAGTGAA     | CACATCACAGCTCCCCACCA      |

**Supplementary Table 4. Correlation of IL1R2 protein expression with clinical pathological features**

| Pathological Features |                    | IL1R2       |            | p value |
|-----------------------|--------------------|-------------|------------|---------|
|                       |                    | low         | high       |         |
|                       |                    | Count       | Count      |         |
| Age                   | Low (<50 years)    | 54 (47.0%)  | 35 (48.6%) | 0.861   |
|                       | High (≥50 years)   | 61 (53.0%)  | 37 (51.4%) |         |
| Histological grade    | Low (Grade 1 & 2)  | 53 (62.4%)  | 37 (63.8%) | 0.861   |
|                       | High (Grade 3)     | 32 (37.6%)  | 21 (36.2%) |         |
| pTNM                  | Low (Stage 1)      | 41 (37.3%)  | 18 (27.3%) | 0.174   |
|                       | High (Stage 2 & 3) | 69 (62.7%)  | 48 (72.7%) |         |
| LN infiltration       | No                 | 58 (50.4%)  | 33 (45.8%) | 0.54    |
|                       | Yes                | 57 (49.6%)  | 39 (54.2%) |         |
| Local recurrence      | No                 | 110 (95.7%) | 68 (94.4%) | 0.707   |
|                       | Yes                | 5 (4.3%)    | 4 (5.6%)   |         |
| Metastasis            | No                 | 105 (91.3%) | 57 (79.2%) | 0.018*  |
|                       | Yes                | 10 (8.7%)   | 15 (20.8%) |         |

\*, Correlation is significant at the 0.05 level (2-tailed),

**Supplementary Table 5 Potential IL1R2-interacting proteins in MB231 and**

**SUM159 cells**

| Gene names | MB231<br>_mIL1R2 | MB231<br>_pSIN | MB231<br>_sIL1R2 | 159<br>_mIL1R2 | 159<br>_pSIN | 159<br>_sIL1R2 |
|------------|------------------|----------------|------------------|----------------|--------------|----------------|
| MLTK       | 1258200          | 1186500        | 0                | 0              | 690400       | 0              |
| DCTN1      | 1458100          | 2803000        | 0                | 1936700        | 1485700      | 1838000        |
| GAR1       | 1578800          | 0              | 1303800          | 1561200        | 1256700      | 1172900        |
| ODR4       | 1747700          | 0              | 1818500          | 0              | 0            | 0              |
| PPP2R2A    | 1753500          | 0              | 58210000         | 2116400        | 1585300      | 61138000       |
| PCMT1      | 1800600          | 1967900        | 0                | 2676200        | 784380       | 1022200        |
| DDB1       | 1839300          | 1060200        | 0                | 3213400        | 1525600      | 4500400        |
| SEL1L      | 2403100          | 0              | 89726000         | 883000         | 0            | 124800000      |
| USP15      | 2430500          | 385300         | 0                | 1650300        | 230100       | 0              |
| TBCD       | 2515800          | 0              | 0                | 23196000       | 0            | 0              |
| RPN1       | 2625100          | 0              | 958480           | 2371100        | 0            | 2325500        |
| HERC2      | 2909100          | 0              | 3234200          | 6118900        | 7201900      | 0              |
| EXOC8      | 2969200          | 0              | 0                | 2676700        | 0            | 0              |
| YWHAZ      | 3002900          | 0              | 2870500          | 0              | 0            | 1899600        |
| CKAP4      | 3232700          | 2822300        | 0                | 2201400        | 0            | 2567500        |
| UQCRC2     | 3251600          | 0              | 0                | 5249700        | 0            | 2310500        |
| PSMD3      | 3585700          | 0              | 3033000          | 2878500        | 2707800      | 2669300        |



|        |         |         |           |          |         |           |
|--------|---------|---------|-----------|----------|---------|-----------|
| ABCF2  | 3947500 | 0       | 0         | 8183300  | 0       | 8597700   |
| HNRNPF | 4081900 | 0       | 4456200   | 3628700  | 0       | 5282300   |
| EXOC2  | 4158500 | 0       | 0         | 4762900  | 0       | 0         |
| RAB18  | 4190000 | 0       | 0         | 4126300  | 0       | 0         |
| UTS2   | 4442100 | 0       | 44125000  | 3566000  | 2034700 | 87168000  |
| SRP9   | 4518300 | 0       | 0         | 10773000 | 5844900 | 6522000   |
|        | 4943400 | 0       | 7906200   | 4298400  | 5853800 | 0         |
| HSPD1  | 5047500 | 0       | 3625800   | 4873600  | 2553500 | 0         |
| NDUFA4 | 5101400 | 0       | 2711700   | 4311000  | 0       | 4891300   |
| CDK1   | 6123900 | 2544200 | 0         | 5708900  | 3193200 | 4610800   |
| RUVBL1 | 6590300 | 0       | 0         | 12692000 | 4291900 | 5238900   |
| DSTN   | 6599200 | 0       | 17307000  | 0        | 0       | 0         |
| PDIA6  | 6866700 | 0       | 41995000  | 4919900  | 7945600 | 38429000  |
| SKP1   | 6989600 | 2564400 | 27291000  | 7952100  | 5675600 | 11698000  |
| ATXN10 | 7079000 | 0       | 0         | 6399000  | 0       | 0         |
| NAP1L1 | 7138700 | 0       | 4757100   | 0        | 0       | 4980100   |
| EIF4A2 | 7491600 | 0       | 3850000   | 6194100  | 0       | 0         |
|        |         |         |           |          | 1991100 |           |
| BCLAF1 | 7524500 | 0       | 8874500   | 15776000 | 0       | 13450000  |
| PDIA3  | 7942300 | 0       | 197280000 | 2008900  | 0       | 263240000 |
| SQSTM1 | 8496000 | 0       | 7013500   | 0        | 0       | 5190100   |
| FASN   | 8737000 | 0       | 8178600   | 4436600  | 1355600 | 13845000  |

|         |          |         |           |          |         |           |
|---------|----------|---------|-----------|----------|---------|-----------|
|         |          |         |           |          | 0       |           |
| SFN     | 8970800  | 0       | 2387700   | 2435800  | 961530  | 0         |
| PSMD7   | 9412100  | 6098900 | 0         | 6384000  | 0       | 3598800   |
| CSE1L   | 9643600  | 0       | 0         | 1252000  | 0       | 0         |
| EIF5A   | 9867900  | 4089800 | 13353000  | 16178000 | 8074200 | 14056000  |
| HSP90B1 | 10214000 | 0       | 44833000  | 0        | 1155800 | 123290000 |
| DNAJA2  | 10478000 | 0       | 1506100   | 6449800  | 0       | 6252700   |
| PSMC1   | 10597000 | 0       | 6853300   | 8941900  | 7363900 | 6165200   |
| USMG5   | 11084000 | 0       | 3081500   | 7555700  | 4282400 | 9965400   |
| RNH1    | 11602000 | 0       | 27173000  | 0        | 0       | 19028000  |
| TUFM    | 11612000 | 0       | 22715000  | 31871000 | 1273000 | 128800000 |
| RBMX    | 11702000 | 5478700 | 12032000  | 0        | 8051400 | 0         |
| HNRNPA0 | 11851000 | 1508100 | 10368000  | 4224600  | 1382000 | 4552200   |
| PKM     | 11858000 | 1091800 | 15737000  | 9235700  | 7594300 | 33606000  |
| CALR    | 13859000 | 0       | 137860000 | 0        | 0       | 243000000 |
| TMEM33  | 14499000 | 0       | 0         | 16791000 | 0       | 5168000   |
| GAPDH   | 14500000 | 7251800 | 0         | 12902000 | 0       | 15302000  |

|         |          |         |          |          |         |          |
|---------|----------|---------|----------|----------|---------|----------|
| S100A10 | 16180000 | 0       | 20433000 | 6081300  | 0       | 16588000 |
| TUBB6   | 16635000 | 0       | 6143900  | 37892000 | 0       | 18177000 |
| KRT5    | 16658000 | 1317900 | 62197000 | 1963800  | 0       | 4423600  |
| UGDH    | 17745000 | 0       | 0        | 2936500  | 0       | 4489500  |
| SLC16A3 | 18482000 | 0       | 6896600  | 3342100  | 0       | 0        |
| TUBAL3  | 19212000 | 0       | 13531000 | 12487000 | 0       | 9590000  |
| CTPS1   | 22113000 | 0       | 24410000 | 5415500  | 0       | 29055000 |
| EXOC4   | 23154000 | 0       | 9299100  | 9301400  | 0       | 0        |
| TUBB3   | 24465000 | 0       | 12185000 | 15719000 | 0       | 17324000 |
| SLC25A1 | 24711000 | 0       | 8346300  | 4214400  | 0       | 0        |
| UBB     | 24904000 | 0       | 13053000 | 40638000 | 1076100 | 18414000 |
| XPOT    | 27624000 | 0       | 0        | 19283000 | 0       | 0        |
| ATP2A2  | 28872000 | 0       | 0        | 19190000 | 0       | 0        |
| NAMPT   | 42251000 | 0       | 11788000 | 21764000 | 0       | 13399000 |
| PRKDC   | 44034000 | 0       | 0        | 16609000 | 0       | 1610900  |
| KPNB1   | 44429000 | 0       | 1286000  | 2766800  | 0       | 0        |
| ATP5A1  | 44557000 | 0       | 2959200  | 32427000 | 2516300 | 19822000 |
| PCNA    | 45087000 | 0       | 32865000 | 29230000 | 1203000 | 29279000 |
| TNPO1   | 50537000 | 0       | 0        | 24491000 | 0       | 0        |
| TECR    | 55457000 | 0       | 15490000 | 2243500  | 0       | 1295600  |

|         |           |   |           |           |         |           |
|---------|-----------|---|-----------|-----------|---------|-----------|
| DNAJA1  | 57724000  | 0 | 23908000  | 38548000  | 1698200 | 40245000  |
| IPO5    | 67390000  | 0 | 0         | 2661700   | 0       | 0         |
| SLC39A7 | 68055000  | 0 | 0         | 9215200   | 0       | 0         |
| IPO7    | 70535000  | 0 | 0         | 23099000  | 0       | 0         |
| VDAC2   | 75227000  | 0 | 0         | 64638000  | 0       | 0         |
| EXOC6B  | 84648000  | 0 | 78271000  | 63012000  | 0       | 65091000  |
| IPO8    | 88388000  | 0 | 7232100   | 22006000  | 0       | 0         |
| SLC25A3 | 101900000 | 0 | 30223000  | 43767000  | 1083300 | 30323000  |
| CLGN    | 109800000 | 0 | 233460000 | 0         | 0       | 0         |
| ATP1A1  | 134320000 | 0 | 3175100   | 4601500   | 0       | 0         |
| HLA-A   | 187200000 | 0 | 1325400   | 78255000  | 0       | 1149200   |
| EXOC6   | 205000000 | 0 | 165300000 | 168770000 | 0       | 134360000 |
| EXOC5   | 401670000 | 0 | 287790000 | 265230000 | 0       | 215480000 |
| NUDT16  | 408910000 | 0 | 129010000 | 518910000 | 0       | 310990000 |
| EXOC7   | 467190000 | 0 | 362760000 | 440040000 | 0       | 402130000 |
| CANX    | 987910000 | 0 | 118110000 | 235050000 | 0       | 115750000 |
| IL1R2   | 791750000 | 0 | 779710000 | 587430000 | 0       | 933450000 |
|         | 0         | 0 | 0         | 0         | 0       | 0         |
